# Supplementary material for: Separation and determination of aflatoxins B1, B2, G1 and G2 in pistachio samples based on magnetic solid phase extraction followed by high performance liquid chromatography with fluorescence detection
Source: Royal Society of Chemistry journal article supplement (doi:10.1039/c4ay00901k), 2014-01-01
Supplement: c4ay00901k1.pdf [file c4ay00901k1.pdf]

**Electronic Supporting information files for**

**Separation and determination of aflatoxins B<sub>1</sub>, B<sub>2</sub>, G<sub>1</sub> and G<sub>2</sub> in pistachio samples based on the magnetic solid phase extraction followed by high performance liquid chromatography with fluorescence detection**

Mahdi Hashemi \*, Zohreh Taherimaslak

*Department of Analytical chemistry, Faculty of chemistry, Bu-Ali Sina University, Hamedan, Iran*

---

Corresponding author. Tel.: +98 811 8282807; Fax: +98 811 8257407  
E-mail addresses: [mhashemi@bacu.ac.ir](mailto:mhashemi@bacu.ac.ir) (M. Hashemi)

## 1) 2.2. Instrumentation (the bromination of AFB<sub>1</sub> and AFG<sub>1</sub> in Kobra cell)

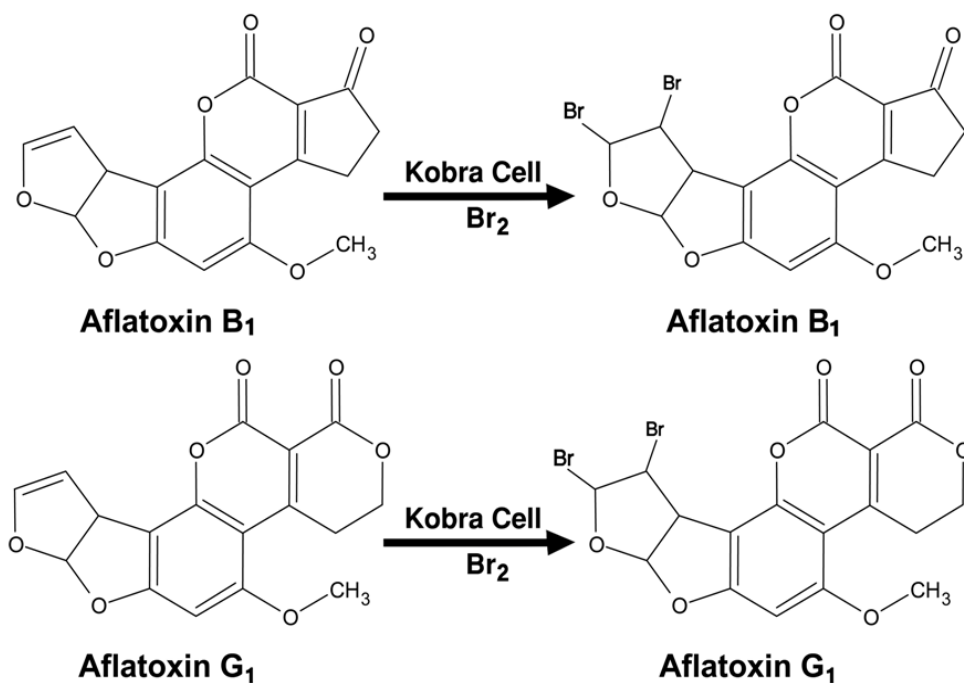

**Fig. S1.** Schematic illustration of the mechanism for the bromination of AFB<sub>1</sub> and AFG<sub>1</sub> in Kobra cell.

## 2) 3.2.2. Effect of sample volume

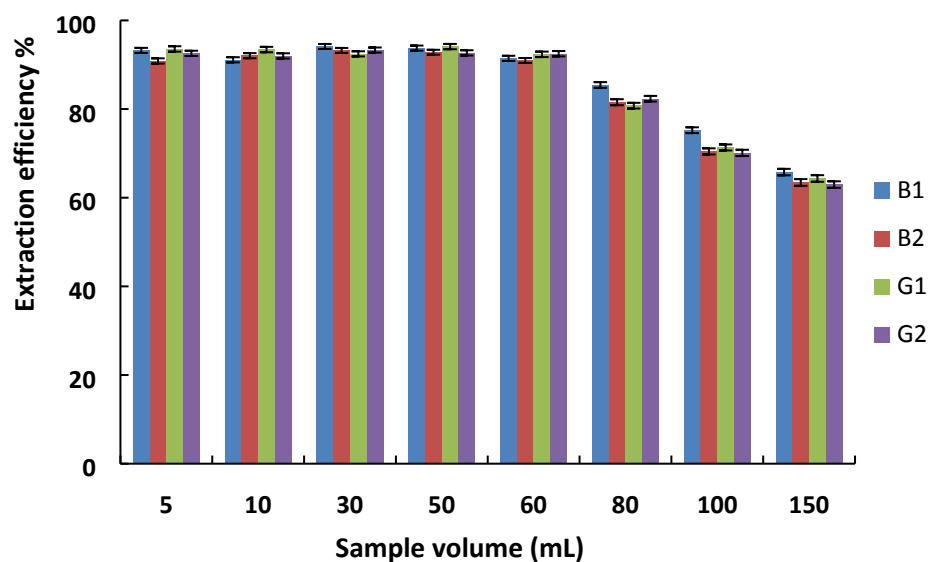

**Fig. S2.** Effect of sample volume on the extraction efficiency. Conditions: Concentration of AFs,  $1.2 \mu\text{g L}^{-1}$  of AFB<sub>1</sub> and AFG<sub>1</sub> and  $0.24 \mu\text{g L}^{-1}$  of AFB<sub>2</sub> and AFG<sub>2</sub>; pH, 7.4; adsorbent amount, 130 mg; adsorption time, 10 min; desorption time, 10 min; desorption solvent type and volume, 2 ml of Me<sub>2</sub>CO/MeCN/CH<sub>2</sub>Cl<sub>2</sub> (1:1:2); reconstituting solvent volume (mobile phase), 300  $\mu\text{L}$ ; HPLC conditions as described in Section 2.2. Error bars represent the standard deviation of the mean recovery for three replicates.

### 3) 3.2.3. The MMNPs amount

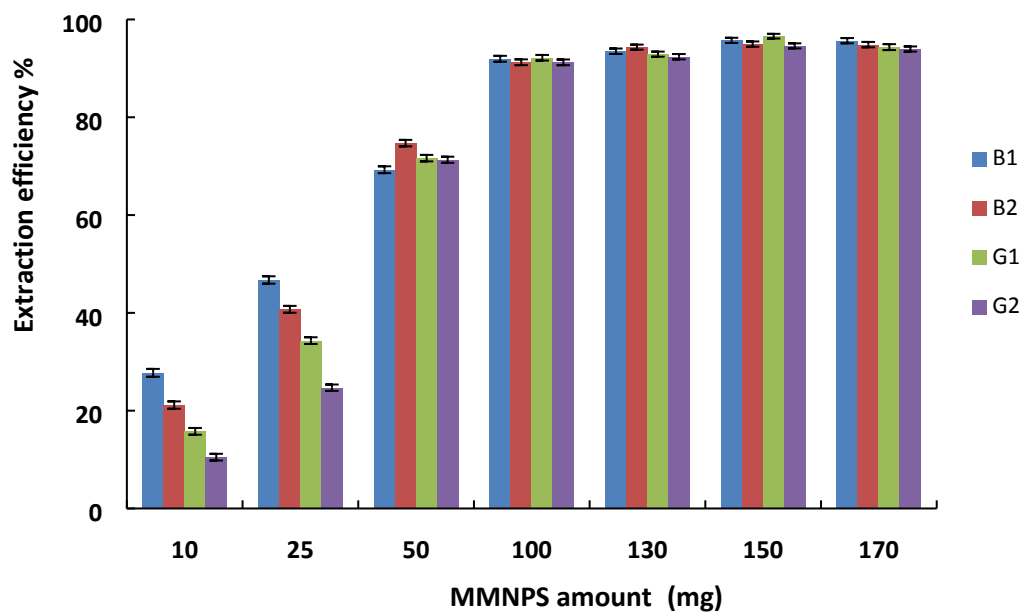

**Fig. S3.** Effect of MMNPs amount on the extraction efficiency. Conditions: Concentration of AFs,  $1.2 \mu\text{g L}^{-1}$  of AFB<sub>1</sub> and AFG<sub>1</sub> and  $0.24 \mu\text{g L}^{-1}$  of AFB<sub>2</sub> and AFG<sub>2</sub>; pH, 7.4; sample volume, 50 mL; adsorption time, 10 min; desorption time, 10 min; desorption solvent type and volume, 2 mL of Me<sub>2</sub>CO/MeCN/CH<sub>2</sub>Cl<sub>2</sub> (1:1:2); reconstituting solvent volume (mobile phase), 300  $\mu\text{L}$ ; HPLC conditions as described in Section 2.2. Error bars represent the standard deviation of the mean recovery for three replicates.

#### 4) 3.2.4. Effect of adsorption time

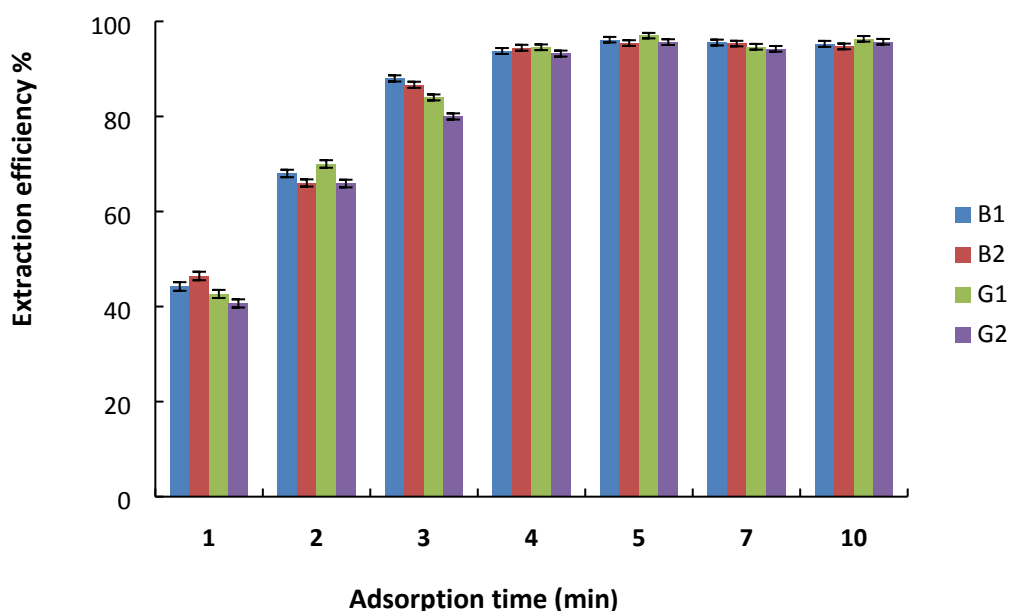

**Fig. S4.** Effect of adsorption time on the extraction efficiency. Conditions: Concentration of AFs,  $1.2 \mu\text{g L}^{-1}$  of  $\text{AFB}_1$  and  $\text{AFG}_1$  and  $0.24 \mu\text{g L}^{-1}$  of  $\text{AFB}_2$  and  $\text{AFG}_2$ ; pH, 7.4; adsorbent amount, 150 mg; sample volume, 50 mL; desorption time, 10 min; desorption solvent type and volume, 2 ml of  $\text{Me}_2\text{CO}/\text{MeCN}/\text{CH}_2\text{Cl}_2$  (1:1:2); reconstituting solvent volume (mobile phase), 300  $\mu\text{l}$ ; HPLC conditions as described in Section 2.2. Error bars represent the standard deviation of the mean recovery for three replicates.

### 5) 3.2.5. Desorption conditions, effect of desorption solvent volume

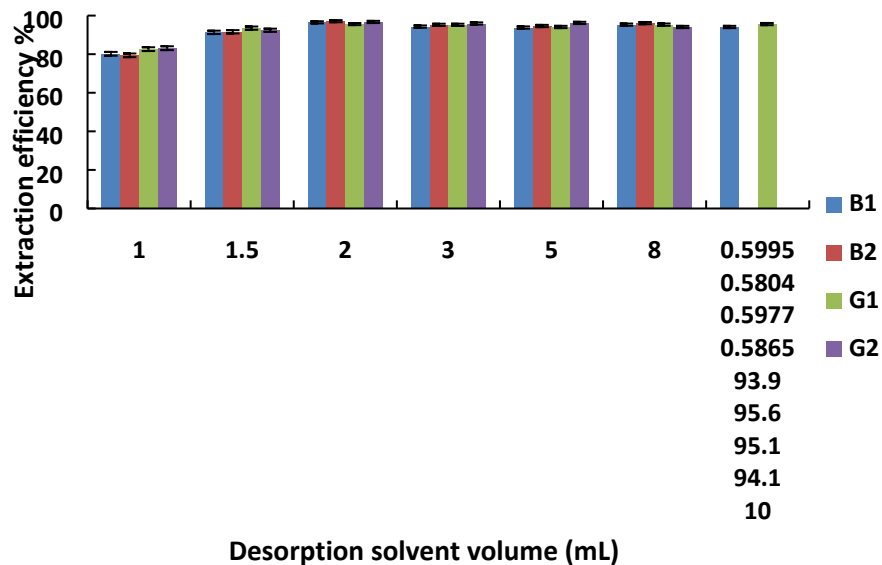

**Fig. S5.** Effect of desorption solvent volume on the extraction efficiency. conditions: Concentration of AFBs,  $1.2 \mu\text{g L}^{-1}$  of AFB<sub>1</sub> and AFG<sub>1</sub> and  $0.24 \mu\text{g L}^{-1}$  of AFB<sub>2</sub> and AFG<sub>2</sub>; pH, 7.4; sample volume, 50 mL; adsorbent amount, 150 mg; adsorption time, 5 min; desorption time, 10 min; desorption solvent type, Me<sub>2</sub>CO/MeCN/CH<sub>2</sub>Cl<sub>2</sub> (1:1:2); reconstituting solvent volume (mobile phase), 300  $\mu\text{l}$ ; HPLC conditions as described in Section 2.2. Error bars represent the standard deviation of the mean recovery for three replicates.

### 6) 3.2.5. Desorption conditions, effect of desorption time

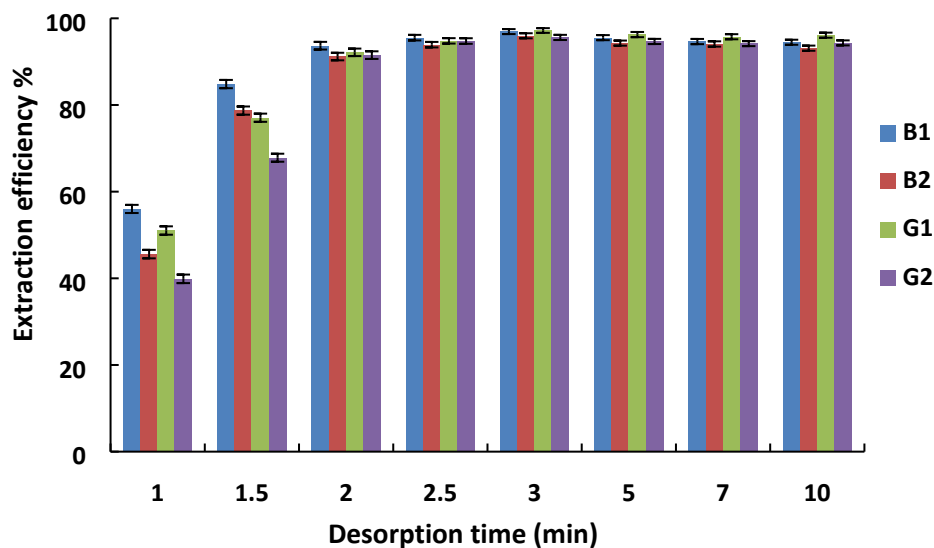

**Fig. S6.** Effect of desorption time on the extraction efficiency. conditions: Concentration of AFs,  $1.2 \mu\text{g L}^{-1}$  of AFB<sub>1</sub> and AFG<sub>1</sub> and  $0.24 \mu\text{g L}^{-1}$  of AFB<sub>2</sub> and AFG<sub>2</sub>; pH, 7.4; sample volume, 50 mL; adsorbent amount, 150 mg; adsorption time, 5 min; desorption solvent type and volume, 2 ml of Me<sub>2</sub>CO/MeCN/CH<sub>2</sub>Cl<sub>2</sub> (1:1:2); reconstituting solvent volume (mobile phase), 300  $\mu\text{l}$ ; HPLC conditions as described in Section 2.2. Error bars represent the standard deviation of the mean recovery for three replicates.
